# Supplementary material for: DSC, FT-IR and NIR with Chemometric Assessment Using PCA and HCA for Estimation of the Chemical Stability of Oral Antidiabetic Drug Linagliptin in the Presence of Pharmaceutical Excipients
Source: MDPI journal article supplement (doi:10.3390/molecules27134283), 2022-07-03
Supplement: s1 [file s1]

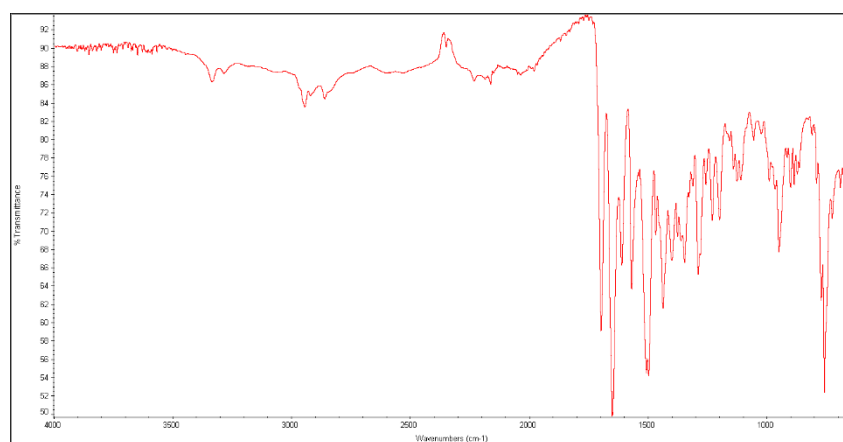

a

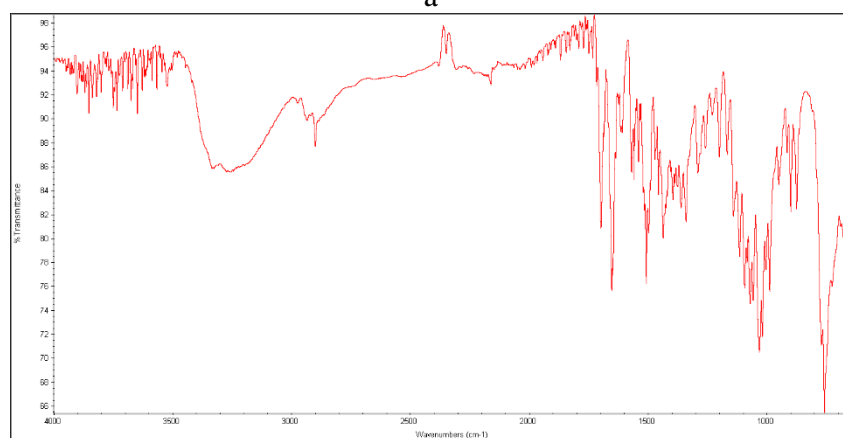

b

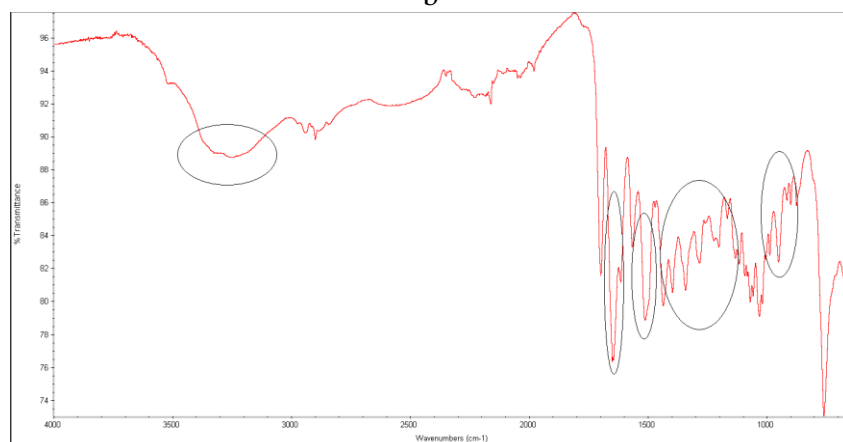

c

Figure S1. a) pure LINA, b) LINA+LAC, c) LINA+LAC (stressed).



**a**

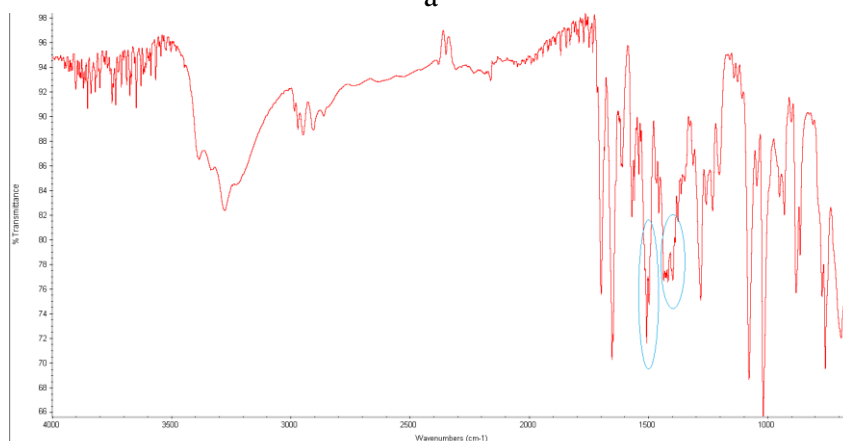

**b**

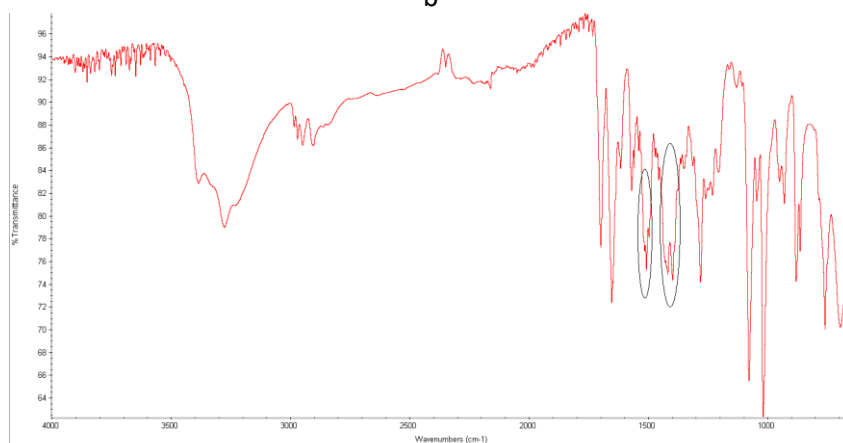

**c**

Figure S2. a) pure LINA, b) LINA+MAN, c) LINA+MAN (stressed).



a

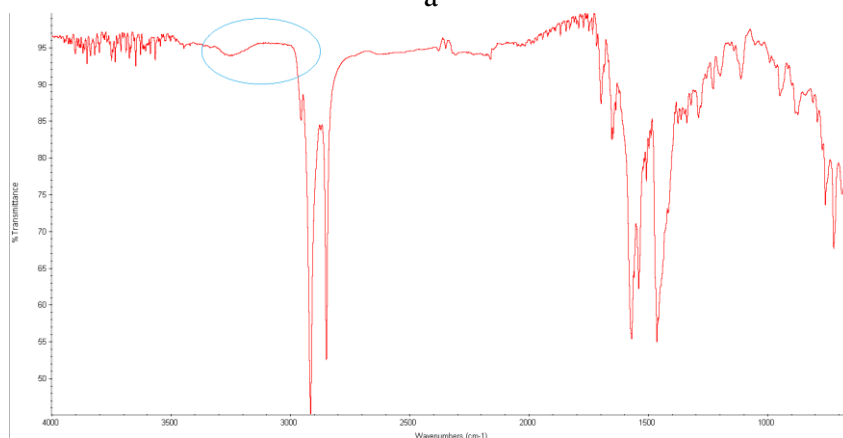

b

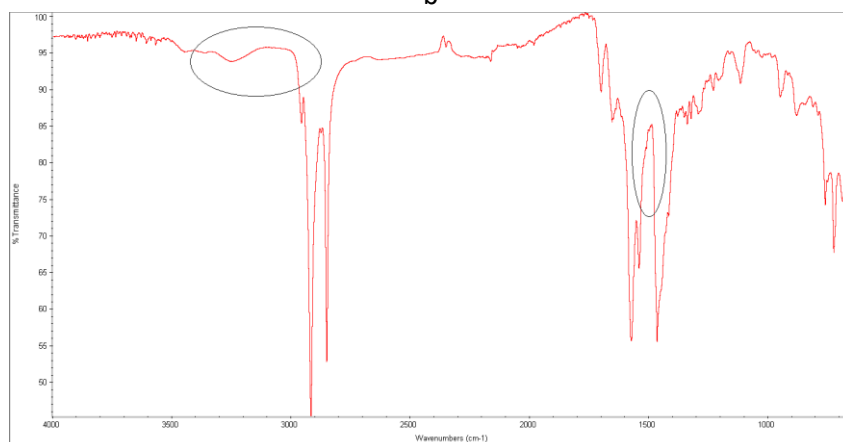

c

Figure S3. a) pure LINA, b) LINA+MGS, c) LINA+MGS (stressed).

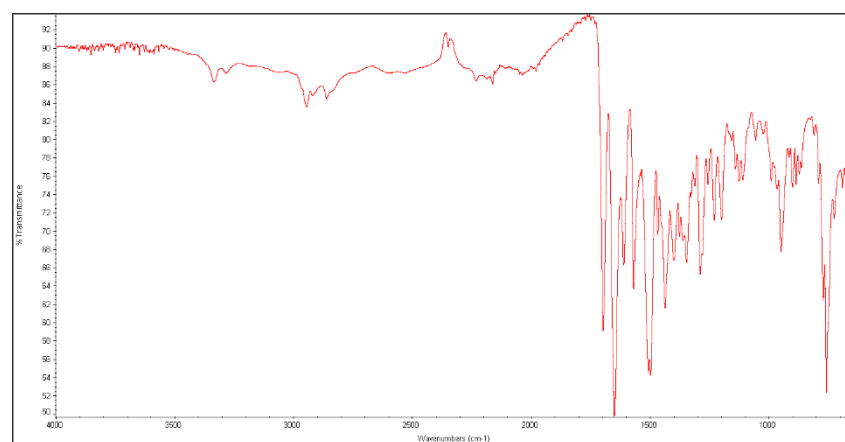

a

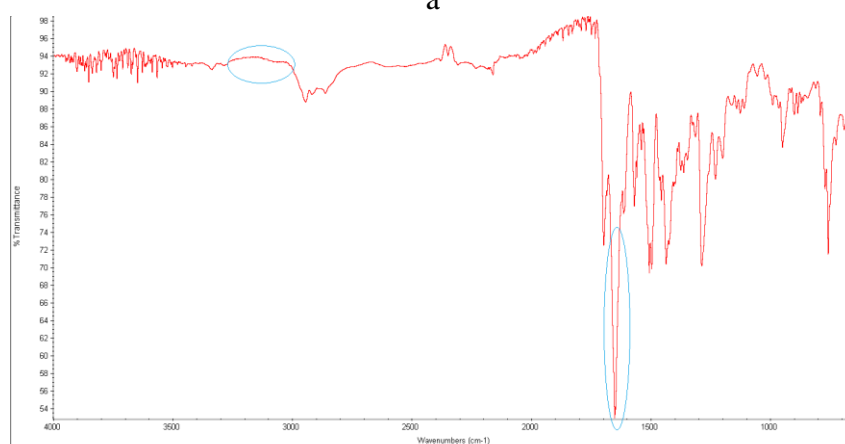

b

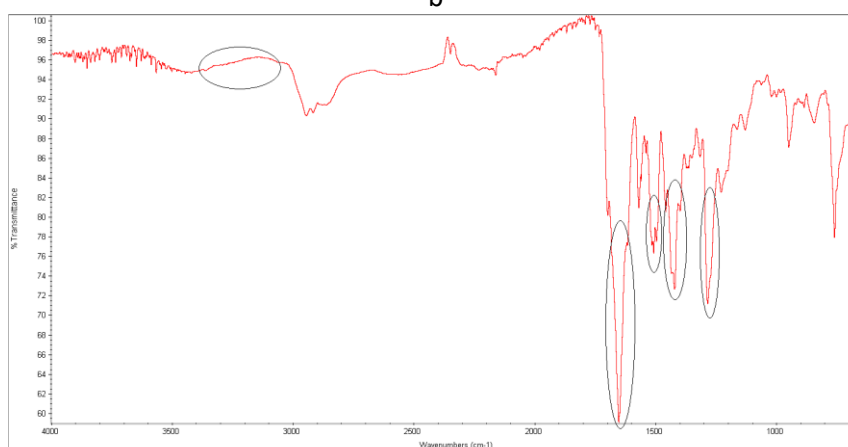

c

Figure S4. a) pure LINA, b) LINA+PVP, c) LINA+PVP (stressed).
